# Supplementary material
Source: publisher figshare collection journal article supplement (https://acs.figshare.com/ndownloader/files/23556718)
Supplement: Supplementary file 1 [file 23556718]

## Supplementary data

### **Facile and Economical Functionalized Hay Biochar with Dairy Effluent for Adsorption of Tetracycline**

Yong-Keun Choi<sup>†, ‡, §</sup>, Rajani Srinivasan<sup>¶</sup>, Eunsung Kan<sup>\*, †, ‡</sup>

<sup>†</sup>Department of Biological and Agricultural Engineering & Texas A&M AgriLife Research Center, Texas A&M University, 1229 North US Highway 281, Stephenville, TX 76401, USA.

<sup>‡</sup>Department of Wildlife, Sustainability, and Ecosystem, Tarleton State University, 1333 W. Washington, Stephenville, TX 76401, USA.

<sup>§</sup>Department of Biological Engineering, Konkuk University, Seoul 05029, Republic of Korea.

<sup>¶</sup>Department of Chemistry, Geosciences and Physics, Tarleton State University, Stephenville, TX 76401, USA.

\*Corresponding author: Eunsung Kan

Texas A&M AgriLife Research Center, Stephenville, TX 76401, USA.

E-mail: [eunsung.kan@ag.tamu.edu](mailto:eunsung.kan@ag.tamu.edu)

Telephone: 1-254-968-4144

Fax: 1-254-968-3759

**1. Characterization of biochar.** The elemental compositions in the AF-BC and DEAF-BC were analyzed by an elemental analyzer (PerkinElmer 2400 Series II, MA, USA). The ash, volatile matter, and fixed carbon content were also determined carbon (C), hydrogen (H), and nitrogen (N) contents in the AF-BC and DEAF-BC were evaluated by an elemental analyzer (PerkinElmer 2400 Series II, MA, USA). Based on the difference of the C, N, H, and ash contents, oxygen content was calculated. The ash, volatile matter, and fixed carbon content were also determined using a muffle furnace (Sybron Termolyne Furnatrol II, Thermolyne, Dubuque, IA, USA) and a pyrolysis reactor (Multi Position Tube Furnace GSL-1100X-S, MTI Co., Richmond, Ca, USA) according to the ASTM standard D1762-84 and D5142-02a <sup>1-3</sup>. The element compositions (i.e. Ca, Mg, K, P, Na, Zn, Cu, Mn and Fe) of AF-BC and DEAF-BC were analyzed by ICP (Spectro Radial Modula ICP, Spectro analytical Instruments, Marlborough, MA). The morphology and elements on the surface of AF-BC and DEAF-BC were analyzed with a scanning electron microscope and Energy Dispersive X-ray Spectroscopy (SEM-EDX, Hitachi S-4800, Hitachi Co., Japan). X-ray diffraction (XRD) patterns of AF-BC and DEAF-BC were determined by Rigaku MiniFlex II (Rigaku, Japan) at a range from 2 to 72° at 1.25° min<sup>-1</sup> with 0.02° (2θ) step size at 30 kV and 15 mA. Crystallization were identified by comparing with the peaks of standard compounds. The measurement of Brunauer-Emmett-Teller (BET) surface area of AF-BC and DEAF-BC were performed on the basis of N<sub>2</sub> adsorption at 77K with Micromeritics Gemini VII 2390p (Norcross, USA). Fourier transform infrared (FTIR) of AF-BC and DEAF-BC was obtained at 400 and 4000 cm<sup>-1</sup> using a Bruker Alpha FTIR spectrometer (Bruker Optik GmbH, Ettlingen, Germany) <sup>3</sup>.

The pH of zero point charges (pH<sub>pzc</sub>) analyses were conducted as described previously <sup>3-4</sup>. Briefly, 50 mL of NaCl solution (0.01 M) adjusted to a range from 3.0 to 10.0 using 0.1M

of NaOH or HCl solution was placed in a 100 mL glass bottle and 0.01 g BC was added to the solution. And then, the final pH of solution was measured after 2 d incubation at 22 °C and 150 rpm. The  $\text{pH}_{\text{pzc}}$  from each set were obtained from the  $\Delta\text{pH}$  (final–initial pH) = 0.

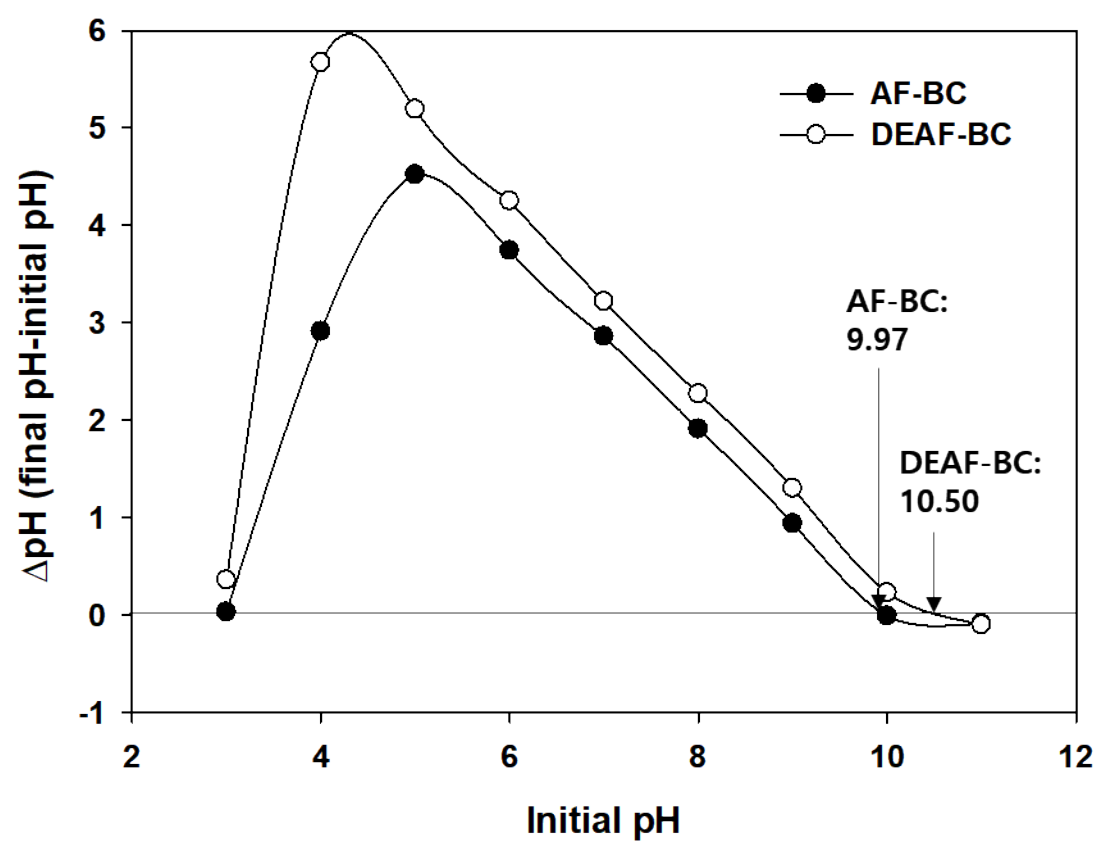

Figure S1.  $\text{pH}_{\text{pzc}}$  of AF-BC and DEAF-BC.

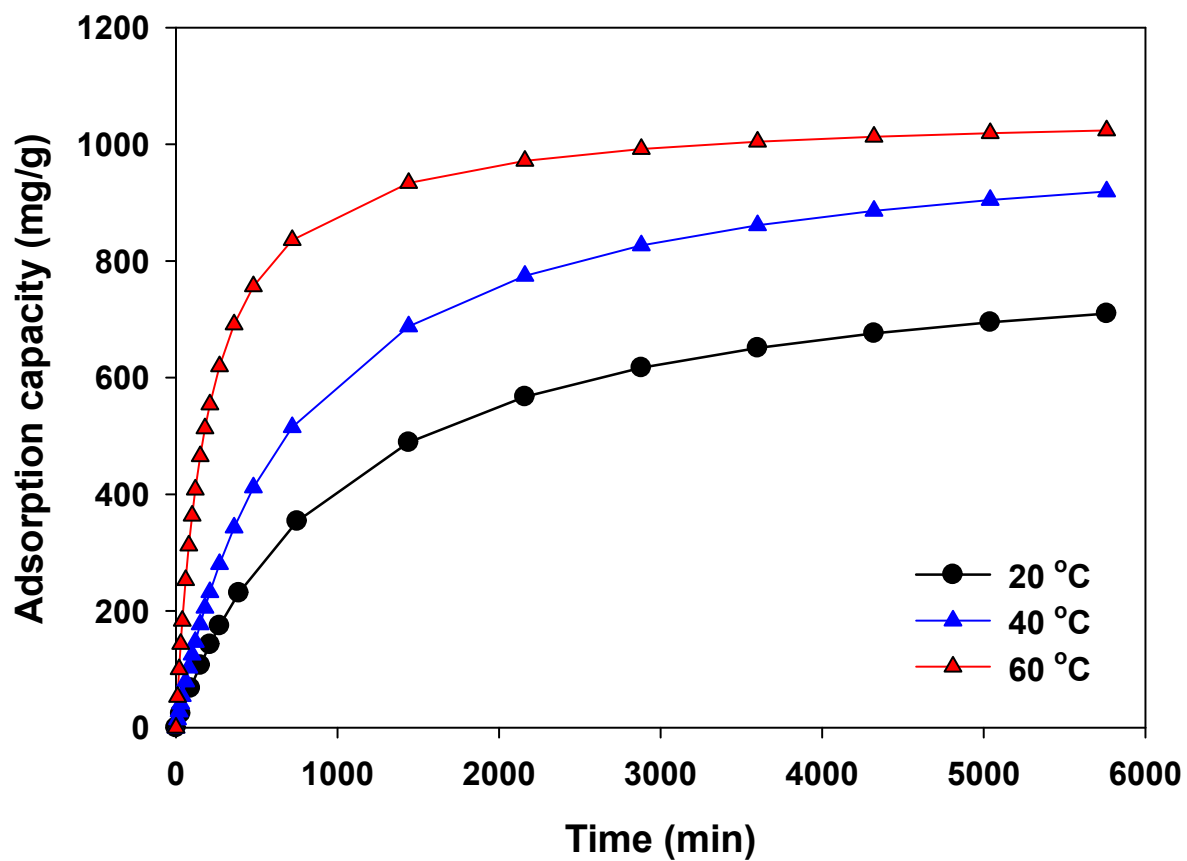

Figure S2. Adsorption of TC onto DEAF-BC at various temperatures. [Conditions] 100 mL, 100 mg/L TC, 0.01 g BC, pH = 6, 4 d. The pseudo second order model was fitted to the experimental data.

Table S1. EDX results of AF-BC and DEAF-BC

| Element (%) | AF-BC | DEAF-BC |
|-------------|-------|---------|
| C           | 67.24 | 47.04   |
| N           | 7.16  | 2.44    |
| O           | 14.76 | 20.63   |
| Na          | 0.66  | 2.56    |
| Mg          | 2.23  | 1.82    |
| P           | 1.05  | 7.85    |
| K           | 0.76  | 0.68    |
| Ca          | 5.95  | 16.37   |
| Fe          | 0.19  | 0.61    |

Table S2. Surface charge of the DEAF-BC and TC adsorption at various solution pH

| pH              | DEAF-BC ( $\text{pH}_{\text{pzc}} = 10.5$ ) | TC ( $\text{pK}_a = 3.3, 7.7, 9.7$ )                     | Interactions                                                         |
|-----------------|---------------------------------------------|----------------------------------------------------------|----------------------------------------------------------------------|
| pH < 3.3        | Positively charge dominated                 | Positively charge ( $\text{H}_4\text{TC}^+$ , dominated) | $\pi$ - $\pi$ interaction and van der waals forces                   |
| 3.3 < pH < 7.7  | Positively charge dominated                 | Non-charge ( $\text{H}_3\text{TC}^0$ , dominated)        | $\pi$ - $\pi$ interaction, hydrogen bonding and van der waals forces |
| 7.7 < pH < 9.7  | Positively charge dominated                 | Negatively charge ( $\text{H}_2\text{TC}^-$ , dominated) | Electrostatic attraction                                             |
| 9.7 < pH < 10.5 | Positively charge dominated                 | Negatively charge ( $\text{HTC}^{2-}$ , dominated)       | Electrostatic attraction                                             |
| pH > 10.5       | Negatively charge dominated                 | Negatively charge ( $\text{HTC}^{2-}$ , dominated)       | $\pi$ - $\pi$ interaction and van der waals forces                   |

Table S3. Adsorption kinetic parameters of TC onto DEAF-BC

| Conc.<br>(mg/L) | Pseudo-first order          |                             |                |                |                             | Pseudo-second order         |                   |                   |                   |                   |      |                |
|-----------------|-----------------------------|-----------------------------|----------------|----------------|-----------------------------|-----------------------------|-------------------|-------------------|-------------------|-------------------|------|----------------|
|                 | Q <sub>e</sub> <sup>a</sup> | Q <sub>e</sub> <sup>b</sup> | K <sub>1</sub> | SSE            | R <sup>2</sup>              | Q <sub>e</sub> <sup>b</sup> | K <sub>2</sub>    | SSE               | R <sup>2</sup>    |                   |      |                |
| 100             | 719.2                       | 701.7                       | 0.0008         | 46.5           | 0.959                       | 835.7                       | 0.0000017         | 38.7              | 0.967             |                   |      |                |
|                 |                             |                             |                |                |                             |                             |                   |                   |                   |                   |      |                |
| Conc.<br>(mg/L) | Elovich                     |                             |                |                |                             | Two-compartment first-order |                   |                   |                   |                   |      |                |
|                 | a                           | b                           | t <sub>o</sub> | SSE            | R <sup>2</sup>              | Q <sub>e</sub> <sup>b</sup> | F <sub>fast</sub> | F <sub>slow</sub> | K <sub>fast</sub> | K <sub>slow</sub> | SSE  | R <sup>2</sup> |
| 100             | 3.34                        | 0.007                       | 40.3           | 62.2           | 0.927                       | 762.8                       | 0.137             | 0.863             | 175.0             | 0.032             | 15.7 | 0.995          |
|                 |                             |                             |                |                |                             |                             |                   |                   |                   |                   |      |                |
| Conc.<br>(mg/L) | Liquid film diffusion       |                             |                |                | Intra-particle diffusion    |                             |                   |                   |                   |                   |      |                |
|                 | Q <sub>e</sub> <sup>b</sup> | K <sub>fd</sub>             | SSE            | R <sup>2</sup> | Q <sub>e</sub> <sup>b</sup> | K <sub>i</sub>              | K <sub>i1</sub>   | K <sub>i2</sub>   | K <sub>i3</sub>   | C <sub>i</sub>    | SSE  | R <sup>2</sup> |
| 100             | 701.7                       | 0.0008                      | 46.5           | 0.959          | 789.3                       | 9.812                       | 17.980            | 11.597            | 4.622             | 44.5              | 35.3 | 0.976          |

a: observed, b: calculated. Conditions: 100 mL of 100 mg/L TC, 0.01 g BC, pH = 6, 22 °C, 4 d.



Table S4. Adsorption isotherm parameters of TC onto DEAF-BC

| Conc.<br>(mg/L) | Langmuir |        |       | Freundlich |       |       | Temkin |       |       |
|-----------------|----------|--------|-------|------------|-------|-------|--------|-------|-------|
|                 | $K_L$    | $Q_m$  | $R^2$ | $K_f$      | $n_f$ | $R^2$ | $b_T$  | $K_T$ | $R^2$ |
| 100             | 0.000008 | 601803 | 0.900 | 22.44      | 1.422 | 0.953 | 16.01  | 0.247 | 0.782 |

[conditions] TC solution (100 mL, 10-600 mg/L), 0.01 g BC, pH = 6, 22 °C, 5 d.

Table S5. Cations in leachate of DEAF-BC at various pH

| Solution pH | Cations (mg/L) |        |          |           |           |         |
|-------------|----------------|--------|----------|-----------|-----------|---------|
|             | Lithium        | Sodium | Ammonium | Potassium | Magnesium | Calcium |
| pH 2        | ND             | 1.76   | ND       | 0.58      | 1.94      | 7.88    |
| pH 6        | ND             | 1.13   | ND       | ND        | 0.45      | 2.70    |
| pH 11       | ND             | 21.19  | ND       | ND        | ND        | 0.83    |

ND: not detected

[conditions] 100 mL of distilled (DI) water, 0.01 g DEAF-BC, 22 °C, 5 d

Table S6. Adsorption kinetic and isotherm models

| Models   | Names: Equations                                                                                                                |
|----------|---------------------------------------------------------------------------------------------------------------------------------|
| Kinetic  | Pseudo-first order: $Q_t = Q_e(1 - \exp(-K_1t))$                                                                                |
|          | Pseudo-second order: $Q_t = Q_e(1 - \exp(-K_2t))$                                                                               |
|          | Elovich: $Q_t = \left(\frac{1}{b}\right) \ln ab + \left(\frac{1}{b}\right) \ln t, t_0 = \frac{1}{ab}$                           |
|          | Intra-particle diffusion: $Q_t = K_i\sqrt{t} + C_i$                                                                             |
|          | Liquid film diffusion: $\ln(1 - F) = -K_{fd}t, F = \frac{Q_t}{Q_e}$                                                             |
|          | Two-compartment: $\frac{Q_t}{Q_e} = F_{fast}(1 - \exp^{-tK_{fast}}) + F_{slow}(1 - \exp^{-tK_{slow}}), F_{fast} + F_{slow} = 1$ |
| Isotherm | Freundlich: $Q_e = K_f C_e^{\frac{1}{n_f}}$                                                                                     |
|          | Langmuir: $Q_e = \frac{Q_m K_L C_e}{1 + K_L C_e}, R_L = \frac{1}{1 + K_L C_0}$                                                  |
|          | Temkin: $Q_e = \frac{RT}{b_T} \ln(K_T C_e)$                                                                                     |

$Q_t$  is an adsorption capacity (mg/g) at time  $t$  (min),  $Q_e$  is an adsorption capacity (mg/g) at equilibrium time,  $K_1$  is a rate constant of Pseudo-first order,  $K_2$  is a rate constant of Pseudo-second order,  $a$  is a rate constant of chemisorption,  $b$  is a constant of the surface coverage,  $K_i$  is Intra-particle diffusion rate constant (mg min<sup>0.5</sup>/g),  $C_i$  is a constant (mg/g),  $K_{fd}$  is adsorption rate constant,  $F_{fast}$  is mass fraction of fast,  $F_{slow}$  is mass fraction of slow,  $K_{fast}$  is first order rate constant for transfer into fast (h<sup>-1</sup>),  $K_{slow}$  is first order rate constant for transfer into slow (h<sup>-1</sup>), and  $h$  is hour.  $Q_e$  is the amount of TC adsorbed per unit mass of adsorbent at equilibrium (mg/g),  $K_f$  is a constant to indicate adsorption capacity,  $C_e$  is the liquid-phase concentration of TC at equilibrium (mg/L),  $1/n_f$  is an indicator of adsorption effectiveness,  $Q_m$  is the maximum adsorption capacity (mg/g),  $K_L$  is the Langmuir constant (L/g) related to the adsorption/desorption energy,  $R_L$  is separation constant, and  $C_0$  is the liquid-phase concentration of TC at initial (mg/L),  $R$  is universal gas constant (8.314 J/mol),  $T$  is temperature in terms of Kelvin,  $b_T$  is Temkin constant,  $K_T$  is equilibrium bond constant related to the maximum energy of bond.

- (1) Standard, A., Standard test method for chemical analysis of wood charcoal. American Society for Testing and Materials, Conshohocken, PA, **2009**.
- (2) Coal, A. C. D.-o.; Coke, Standard Test Methods for Proximate Analysis of the Analysis Sample of Coal and Coke by Instrumental Procedures. ASTM International: **2009**.
- (3) Choi, Y.-K.; Kan, E., Effects of pyrolysis temperature on the physicochemical properties of alfalfa-derived biochar for the adsorption of bisphenol A and sulfamethoxazole in water. *Chemosphere*. **2019**, *218*, 741-748.
- (4) Jang, H. M.; Yoo, S.; Choi, Y.-K.; Park, S.; Kan, E., Adsorption isotherm, kinetic modeling and mechanism of tetracycline on *Pinus taeda*-derived activated biochar. *Bioresour. Technol.* 2018, *259*, 24-31.
